# Supplementary material for: Dengue in Adults Admitted to a Referral Hospital in Hanoi, Vietnam
Source: PubMed Central journal article supplement (PMC4458817; doi:10.4269/ajtmh.14-0472), 2015-06-03
Supplement: SD2.pdf [file SD2.pdf]

SUPPLEMENTAL TABLE 1  
Clinical features of five patients who had pulse pressures of 20 mmHg

| Age | Sex | Illness day | Temperature (°C) | Pulse rate b/min | Cool hands or feet | Swelling  | Mucosal bleeding | Abdominal tenderness | Abdominal pain | Enlarged liver | Plasma leakage | Hematocrit (%)* |
|-----|-----|-------------|------------------|------------------|--------------------|-----------|------------------|----------------------|----------------|----------------|----------------|-----------------|
| 19  | M   | 5           | 36.5             | 84               | N                  | N         | N                | N                    | Y (D6)         | N              | N              | 43.3            |
| 25  | M   | 6           | 36.4             | 72               | N                  | N         | ND               | N                    | N              | N              | N              | 45.3            |
| 30  | M   | 6           | 38.3             | 72               | Y                  | N         | ND               | N                    | Y (D7)         | N              | N              | 47.7            |
| 72  | F   | 7           | 36               | 88               | N                  | N         | Vagina (D4–D8)   | N                    | N              | N              | N              | 41.5            |
| 23  | F   | 10          | 36.2             | ND†              | N                  | Face (D6) | ND               | N                    | Y (D7)         | ND             | Ascites (D6)   | 42.2            |

F = female; M = male; N = no; ND = no data; Y = yes.

\*Hematocrit on the day the pulse pressure was 20 mmHg.

†On D9: pulse = 76/min, blood pressure (BP) = 85/60.
